# Supplementary material for: Pesticide exposure and risk of Alzheimer’s disease: a systematic review and meta-analysis
Source: PubMed Central journal article supplement (PMC5007474; doi:10.1038/srep32222), 2016-09-01
Supplement: srep32222-s2.pdf [file srep32222-s2.pdf]

## Supplementary Figure S1

### Pesticides exposure and risk of Alzheimer's disease: a systematic review and meta-analysis

#### Authors

Dandan Yan, Yunjian Zhang, Liegang Liu, Hong Yan \*

Dandan Yan, department of Health Toxicology, MOE Key Lab of Environment and Health, School of Public Health, Tongji Medical College, Huazhong University of Science and Technology, 13 Hangkong-Road, Wuhan, 430030, PR China.

E-mail: [460316065@qq.com](mailto:460316065@qq.com)

Yunjian Zhang, department of Huazhong Univ Sci & Technol, Tongji Med Coll, Union Hosp, Dept Neurol, Wuhan 430030, Peoples R China

E-mail: [Zhangyunjian66@126.com](mailto:Zhangyunjian66@126.com)

Liegang Liu, department of Nutrition and Food Hygiene, Hubei Key Laboratory of Food Nutrition and Safety, Tongji Medical College, Huazhong University of Science and Technology, 13 Hangkong-Road, Wuhan, 430030, PR China.

E-mail: [liuliegang@mails.tjmu.edu.cn](mailto:liuliegang@mails.tjmu.edu.cn)

#### \*Corresponding author:

Hong Yan: Department of Health Toxicology, MOE Key Lab of Environment and Health, School of Public Health, Tongji Medical College, Huazhong University of Science and Technology, 13 Hangkong-Road, Wuhan, 430030, PR China.

E-mail: [yanhong@mails.tjmu.edu.cn](mailto:yanhong@mails.tjmu.edu.cn) (H. Yan)

Phone: +86-27-83692720; Fax: +86-27-83692333.

Meta-analysis estimates, given named study is omitted

| Lower CI Limit      ○ Estimate      | Upper CI Limit

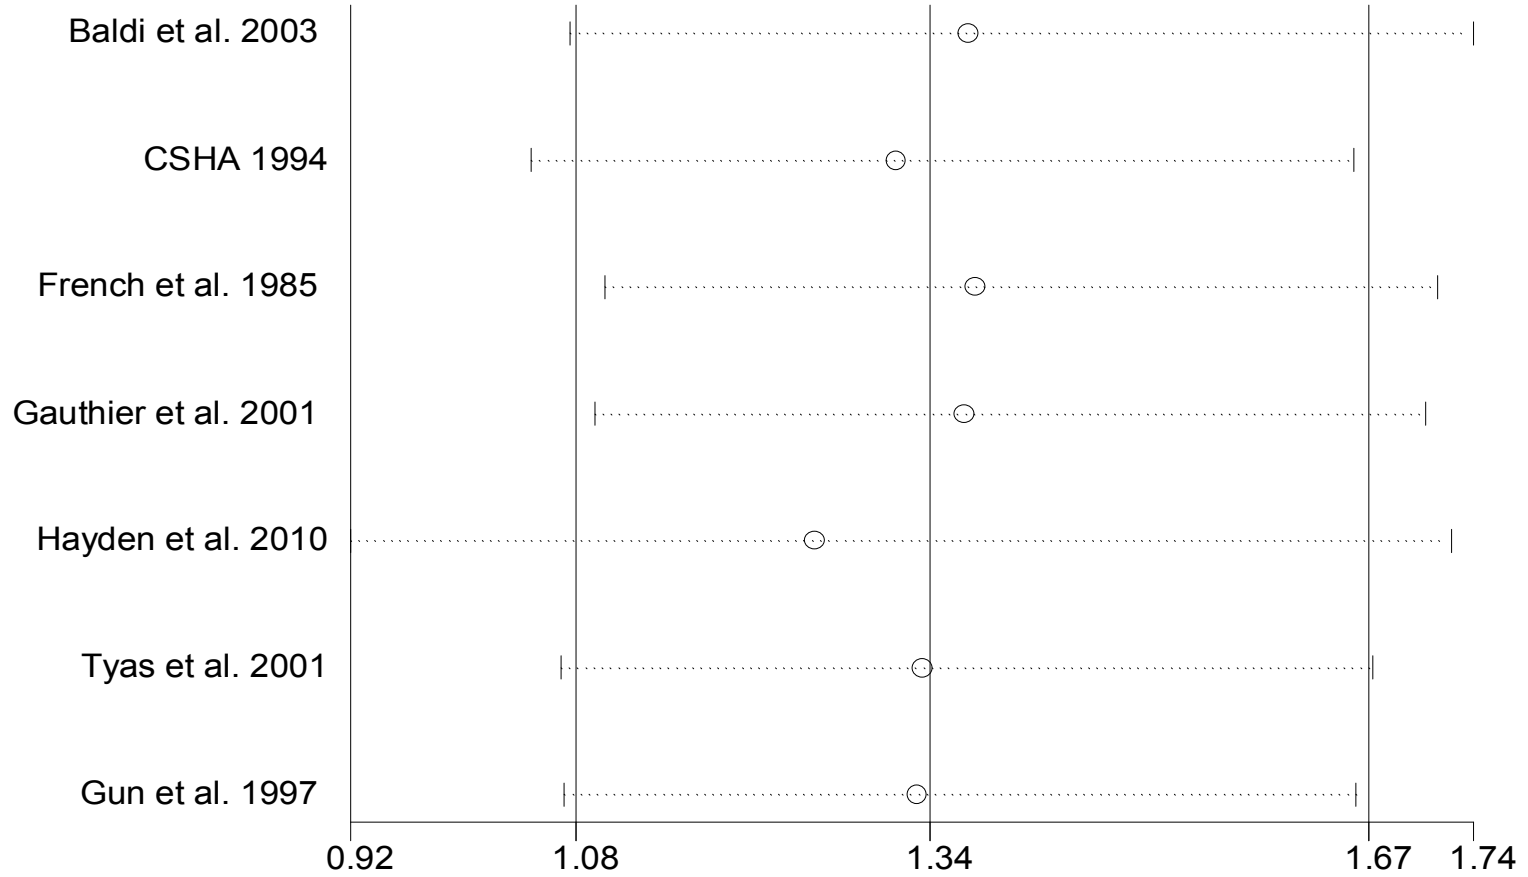

**Supplementary Figure S1: Results of sensitivity analysis using leave-one-out method.**

Figure legend: The circles and the horizontal lines represent the ORs and 95% CIs after omitting studies in turn. The vertical dashed lines show the OR of 1.08 and 1.67.
